# Supplementary material for: Higher plasma high-mobility group box 1 levels are associated with incident cardiovascular disease and all-cause mortality in type 1 diabetes: a 12 year follow-up study
Source: PubMed Central journal article supplement (PMC3411294; doi:10.1007/s00125-012-2622-1), 2012-07-01
Supplement: 125_2012_2622_MOESM2_ESM.pdf [file 125_2012_2622_MOESM2_ESM.pdf]

**ESM Table 1** Baseline characteristics according to the occurrence of cardiovascular events and of death during follow-up

|                                                            | Fatal or non-fatal<br>CVD event N=82 | No CVD event<br>N=251 | <i>p</i> value | Died at follow-<br>up N=80 | Alive at follow-up<br>N=253 | <i>p</i> value |
|------------------------------------------------------------|--------------------------------------|-----------------------|----------------|----------------------------|-----------------------------|----------------|
| Age (yrs)                                                  | 44.6 (9.2)                           | 40.4 (9.6)            | 0.001          | 45.5 (10.1)                | 40.2 (9.2)                  | <0.001         |
| Sex: male (%)                                              | 61.0                                 | 60.6                  | 0.946          | 68.8                       | 58.1                        | 0.115          |
| Nephropathy (%)                                            | 75.6                                 | 41.0                  | <0.001         | 76.8                       | 40.6                        | <0.001         |
| Duration of diabetes (yrs)                                 | 30.8 (8.7)                           | 26.8 (7.5)            | <0.001         | 30.2 (10.0)                | 27.0 (7.2)                  | 0.008          |
| HbA1c (%)                                                  | 9.6 (1.5)                            | 8.8 (1.4)             | <0.001         | 9.6 (1.5)                  | 8.8 (1.3)                   | <0.001         |
| Diastolic blood pressure (mmHg)                            | 85 (13)                              | 79 (12)               | <0.001         | 87 (13)                    | 79 (11)                     | <0.001         |
| Systolic blood pressure (mmHg)                             | 157 (24)                             | 135 (20)              | <0.001         | 160 (24)                   | 135 (19)                    | <0.001         |
| Mean arterial pressure (mmHg)                              | 109 (14)                             | 98 (13)               | <0.001         | 111 (14)                   | 97 (12)                     | <0.001         |
| <i>Pulse pressure (mmHg)</i>                               | 72 (21)                              | 57 (15)               | <0.001         | 73 (21)                    | 57 (15)                     | <0.001         |
| BMI (kg/m <sup>2</sup> )                                   | 23.9 (3.3)                           | 23.9 (2.8)            | 0.957          | 23.8 (3.2)                 | 23.9 (2.9)                  | 0.655          |
| Smoking: never/former/current (%)                          | 29.3/18.3/52.4                       | 37.5/17.5/45.0        | 0.378          | 26.3/16.3/57.4             | 38.3/18.2/43.5              | 0.073          |
| Total cholesterol (mmol/l)                                 | 5.71 (1.12)                          | 5.00 (1.13)           | <0.001         | 5.81 (1.13)                | 4.97 (1.10)                 | <0.001         |
| RAAS inhibitors: yes (%)                                   | 51.2                                 | 19.5                  | <0.001         | 51.3                       | 19.8                        | <0.001         |
| Other antihypertensive treatment: yes (%)                  | 64.6                                 | 28.2                  | <0.001         | 70.0                       | 26.9                        | <0.001         |
| Discontinuation of medication at baseline(%)               | 67.1                                 | 89.6                  | <0.001         | 68.8                       | 88.9                        | <0.001         |
| Retinopathy: no/simplex/proliferative (%)                  | 8.5/36.6/54.9                        | 21.1/45.0/33.9        | 0.001          | 6.3/37.5/56.2              | 21.7/44.7/33.6              | <0.001         |
| C-reactive protein (mg/l)                                  | 1.63 [0.73-3.24]                     | 0.97 [0.42-2.27]      | 0.008          | 1.45 [0.64-3.36]           | 1.02 [0.44-2.19]            | 0.016          |
| Interleukin-6 (pg/ml)                                      | 2.17 [1.53-3.43]                     | 1.49 [0.98-2.34]      | <0.001         | 2.38 [1.79-3.91]           | 1.44 [1.00-2.21]            | <0.001         |
| Secreted phospholipase A2 (µg/ml)                          | 4.40 [2.80-6.95]                     | 4.00 [2.70-6.30]      | 0.313          | 4.05 [2.80-6.45]           | 4.00 [2.70-6.60]            | 0.844          |
| <i>Low-grade inflammation score</i>                        | 0.24 (0.63)                          | -0.08 (0.76)          | 0.001          | 0.23 (0.69)                | -0.07 (0.75)                | 0.001          |
| sICAM-1 (ng/ml)                                            | 780 (254)                            | 726 (273)             | 0.115          | 817 (281)                  | 715 (261)                   | 0.003          |
| sVCAM-1 (ng/ml)                                            | 1051 (273)                           | 982 (348)             | 0.102          | 1105 (350)                 | 966 (320)                   | 0.001          |
| <i>Endothelial dysfunction score</i>                       | 0.15 (0.70)                          | -0.05 (0.81)          | 0.041          | 0.30 (0.84)                | -0.10 (0.75)                | <0.001         |
| N <sup>ε</sup> -(carboxyethyl)lysine (µmol/l)              | 1.02 (0.29)                          | 0.92 (0.19)           | 0.007          | 1.03 (0.30)                | 0.92 (0.18)                 | 0.004          |
| N <sup>ε</sup> -(carboxymethyl)lysine (µmol/l)             | 3.59 (1.16)                          | 3.53 (0.84)           | 0.657          | 3.55 (1.35)                | 3.55 (0.75)                 | 0.990          |
| Pentosidine (pmol/mg)                                      | 50.7 [34.5-71.8]                     | 40.8 [34.2-48.9]      | 0.005          | 51.8 [33.4-71.9]           | 41.0 [34.4-48.9]            | 0.008          |
| <i>Advanced glycation endproducts score</i>                | 0.24 (1.22)                          | -0.08 (0.78)          | 0.030          | 0.24 (1.36)                | -0.08 (0.71)                | 0.048          |
| sRAGE (ng/ml)*                                             | 1.04 [0.80-1.41]                     | 0.97 [0.72-1.36]      | 0.041          | 1.13 [0.83-1.52]           | 0.96 [0.72-1.31]            | 0.001          |
| Estimated GFR <sub>MDRD</sub> (ml/min/1.73m <sup>2</sup> ) | 65 (29)                              | 87 (21)               | <0.001         | 65 (27)                    | 87 (22)                     | <0.001         |
| Urinary albumin excretion rate (mg/24h)                    | 658 [34-1983]                        | 16 [7-495]            | <0.001         | 762 [100-2030]             | 15 [7-451]                  | <0.001         |

Data are means (SD), medians [inter-quartile range] or percentages, as appropriate. CVD, cardiovascular disease; RAAS-inhibitors, renin-angiotensin-aldosterone system inhibitors; sICAM-1, soluble intercellular adhesion molecule-1; sVCAM-1, soluble vascular cell adhesion molecule-1; sRAGE, soluble receptor for advanced glycation endproducts; estimated GFR<sub>MDRD</sub>, estimated glomerular filtration rate by abbreviated modification of diet in renal disease equation.

\* analyses confined to 331 subjects because of missing data in 2 individuals
