# Supplementary material for: Higher plasma high-mobility group box 1 levels are associated with incident cardiovascular disease and all-cause mortality in type 1 diabetes: a 12 year follow-up study
Source: PubMed Central journal article supplement (PMC3411294; doi:10.1007/s00125-012-2622-1), 2012-07-01
Supplement: 125_2012_2622_MOESM3_ESM.pdf [file 125_2012_2622_MOESM3_ESM.pdf]

**ESM Table 2** Associations between cardiovascular risk factors and log<sub>e</sub> HMGB1 (N=333)

| Independent variable                      | Model 1:<br>univariate |              |                | Model 2:<br>age and sex-adjusted |              |                | Model 3:<br>Fully adjusted |              |                |
|-------------------------------------------|------------------------|--------------|----------------|----------------------------------|--------------|----------------|----------------------------|--------------|----------------|
|                                           | $\beta$                | 95% CI       | <i>p</i> value | $\beta$                          | 95% CI       | <i>p</i> value | $\beta$                    | 95% CI       | <i>p</i> value |
| Age (per SD)                              | -0.15                  | -0.26; -0.04 | 0.006          | -0.15                            | -0.26; -0.05 | 0.005          | -0.11                      | -0.24; 0.03  | 0.131          |
| Female sex                                | -0.20                  | -0.42; 0.02  | 0.079          | -0.21                            | -0.43; 0.01  | 0.061          | -0.16                      | -0.38; 0.07  | 0.166          |
| Nephropathy at baseline                   | 0.02                   | -0.20; 0.23  | 0.875          | -0.02                            | -0.24; 0.19  | 0.843          | 0.16                       | -0.14; 0.46  | 0.303          |
| Duration of diabetes (per SD)             | -0.12                  | -0.23; -0.02 | 0.024          | -0.04                            | -0.17; 0.10  | 0.578          | -0.01                      | -0.14; 0.12  | 0.867          |
| HbA1c (per SD)                            | -0.12                  | -0.23; -0.02 | 0.024          | -0.12                            | -0.22; -0.01 | 0.034          | -0.12                      | -0.23; 0.00  | 0.047          |
| Mean arterial pressure (per SD)           | 0.02                   | -0.09; 0.13  | 0.727          | 0.02                             | -0.09; 0.13  | 0.699          | 0.11                       | -0.02; 0.24  | 0.110          |
| BMI (per SD)                              | -0.10                  | -0.21; 0.01  | 0.069          | -0.10                            | -0.20; 0.01  | 0.079          | -0.07                      | -0.18; 0.04  | 0.210          |
| Smoking status                            |                        |              |                |                                  |              |                |                            |              |                |
| former vs. never                          | -0.13                  | -0.44; 0.18  | 0.397          | -0.02                            | -0.16; 0.12  | 0.761          | -0.02                      | -0.34; 0.29  | 0.881          |
| current vs. never                         | 0.29                   | 0.05; 0.53   | 0.017          | 0.30                             | 0.07; 0.54   | 0.012          | 0.33                       | 0.09; 0.57   | 0.007          |
| Total cholesterol (per SD)                | -0.16                  | -0.26; -0.05 | 0.004          | -0.14                            | -0.25; -0.04 | 0.009          | -0.16                      | -0.28; -0.04 | 0.008          |
| RAAS inhibitors                           | -0.06                  | -0.31; 0.18  | 0.603          | -0.09                            | -0.33; 0.15  | 0.450          | -0.04                      | -0.35; 0.27  | 0.796          |
| Other anti-hypertensive treatment         | -0.16                  | -0.38; 0.07  | 0.163          | -0.11                            | -0.34; 0.11  | 0.315          | -0.10                      | -0.41; 0.20  | 0.508          |
| Discontinuation of medication at baseline | 0.16                   | -0.14; 0.45  | 0.295          | 0.11                             | -0.18; 0.40  | 0.454          | 0.04                       | -0.29; 0.37  | 0.822          |

$\beta$ , standardised regression coefficient: indicates change in log<sub>e</sub> HMGB1 (in SD) per SD increase in independent variable.
