# Supplementary material for: Higher plasma high-mobility group box 1 levels are associated with incident cardiovascular disease and all-cause mortality in type 1 diabetes: a 12 year follow-up study
Source: PubMed Central journal article supplement (PMC3411294; doi:10.1007/s00125-012-2622-1), 2012-07-01
Supplement: 125_2012_2622_MOESM4_ESM.pdf [file 125_2012_2622_MOESM4_ESM.pdf]

**ESM Table 3** Associations between study covariates with incident fatal and non-fatal CVD and all cause mortality

| Independent variable                    | Model 1:<br>univariate |            |                | Model 2:<br>Age and sex-adjusted |            |                | Model 3:<br>Fully adjusted |            |                |
|-----------------------------------------|------------------------|------------|----------------|----------------------------------|------------|----------------|----------------------------|------------|----------------|
|                                         | HR                     | 95% CI     | <i>p</i> value | HR                               | 95% CI     | <i>p</i> value | HR                         | 95% CI     | <i>p</i> value |
| <i>Outcome: fatal and non-fatal CVD</i> |                        |            |                |                                  |            |                |                            |            |                |
| Age (per SD)                            | 1.43                   | 1.16; 1.78 | 0.001          | 1.43                             | 1.15; 1.77 | 0.001          | 1.31                       | 0.99; 1.75 | 0.061          |
| Female sex                              | 0.88                   | 0.56; 1.37 | 0.563          | 0.92                             | 0.59; 1.44 | 0.730          | 0.92                       | 0.56; 1.50 | 0.729          |
| Nephropathy at baseline                 | 3.62                   | 2.18; 6.00 | <0.001         | 4.06                             | 2.44; 6.76 | <0.001         | 1.36                       | 0.67; 2.74 | 0.392          |
| Duration of diabetes (per SD)           | 1.47                   | 1.21; 1.79 | <0.001         | 1.34                             | 1.05; 1.70 | 0.017          | 1.14                       | 0.89; 1.47 | 0.300          |
| HbA1c (per SD)                          | 1.47                   | 1.21; 1.79 | <0.001         | 1.52                             | 1.23; 1.86 | <0.001         | 1.19                       | 0.95; 1.50 | 0.126          |
| Mean arterial pressure (per SD)         | 1.93                   | 1.58; 2.35 | <0.001         | 1.91                             | 1.55; 2.34 | <0.001         | 1.51                       | 1.17; 1.95 | 0.001          |
| BMI (per SD)                            | 0.99                   | 0.79; 1.23 | 0.922          | 0.96                             | 0.77; 1.20 | 0.721          | 0.89                       | 0.71; 1.11 | 0.288          |
| Smoking status                          |                        |            |                |                                  |            |                |                            |            |                |
| former vs. never                        | 1.10                   | 0.57; 2.12 | 0.768          | 0.89                             | 0.46; 1.73 | 0.735          | 1.05                       | 0.53; 2.10 | 0.893          |
| current vs. never                       | 1.44                   | 0.87; 2.37 | 0.155          | 1.40                             | 0.85; 2.30 | 0.192          | 1.62                       | 0.95; 2.75 | 0.074          |
| Total cholesterol (per SD)              | 1.68                   | 1.39; 2.04 | <0.001         | 1.62                             | 1.34; 1.98 | <0.001         | 1.25                       | 0.99; 1.58 | 0.062          |
| RAAS inhibitors                         | 3.26                   | 2.11; 5.03 | <0.001         | 3.34                             | 2.16; 5.17 | <0.001         | 1.14                       | 0.65; 1.98 | 0.654          |
| Other anti-hypertensive treatment       | 3.69                   | 2.34; 5.82 | <0.001         | 3.64                             | 2.30; 5.76 | <0.001         | 1.48                       | 0.80; 2.71 | 0.210          |
| Discontinuation of medication           | 0.28                   | 0.18; 0.45 | <0.001         | 0.28                             | 0.17; 0.44 | <0.001         | 0.50                       | 0.29; 0.86 | 0.013          |
| <i>Outcome: all-cause mortality</i>     |                        |            |                |                                  |            |                |                            |            |                |
| Age (per SD)                            | 1.60                   | 1.29; 1.98 | <0.001         | 1.57                             | 1.27; 1.95 | <0.001         | 1.72                       | 1.30; 2.26 | <0.001         |
| Female sex                              | 0.66                   | 0.41; 1.06 | 0.088          | 0.70                             | 0.44; 1.13 | 0.143          | 0.69                       | 0.41; 1.14 | 0.148          |
| Nephropathy at baseline                 | 4.45                   | 2.60; 7.61 | <0.001         | 1.64                             | 3.02; 8.87 | <0.001         | 1.42                       | 0.69; 2.94 | 0.340          |
| Duration of diabetes (per SD)           | 1.43                   | 1.16; 1.75 | 0.001          | 1.20                             | 0.94; 1.53 | 0.154          | 0.95                       | 0.73; 1.24 | 0.711          |
| HbA1c (per SD)                          | 1.57                   | 1.29; 1.91 | <0.001         | 1.67                             | 1.35; 2.06 | <0.001         | 1.31                       | 1.04; 1.66 | 0.021          |
| Mean arterial pressure (per SD)         | 2.23                   | 1.82; 2.73 | <0.001         | 2.16                             | 1.76; 2.67 | <0.001         | 1.85                       | 1.42; 2.41 | <0.001         |
| BMI (per SD)                            | 0.93                   | 0.74; 1.17 | 0.528          | 0.87                             | 0.68; 1.10 | 0.238          | 0.74                       | 0.59; 0.92 | 0.007          |
| Smoking status                          |                        |            |                |                                  |            |                |                            |            |                |
| former vs. never                        | 1.27                   | 0.63; 2.53 | 0.504          | 0.89                             | 0.43; 1.80 | 0.736          | 0.99                       | 0.48; 2.06 | 0.977          |
| current vs. never                       | 1.77                   | 1.06; 2.96 | 0.031          | 1.65                             | 0.98; 2.76 | 0.060          | 1.62                       | 0.94; 2.79 | 0.081          |
| Total cholesterol (per SD)              | 1.74                   | 1.43; 2.10 | <0.001         | 1.65                             | 1.36; 2.00 | <0.001         | 1.24                       | 0.98; 1.57 | 0.076          |
| RAAS inhibitors                         | 3.23                   | 2.09; 5.02 | <0.001         | 3.32                             | 2.13; 5.17 | <0.001         | 0.82                       | 0.47; 1.43 | 0.484          |
| Other anti-hypertensive treatment       | 4.94                   | 3.06; 7.98 | <0.001         | 5.09                             | 3.14; 8.25 | <0.001         | 2.31                       | 1.24; 4.32 | 0.009          |
| Discontinuation of medication           | 0.33                   | 0.20; 0.53 | <0.001         | 0.32                             | 0.20; 0.51 | <0.001         | 0.65                       | 0.38; 1.14 | 0.134          |

HR, hazard-ratio per SD increase in independent variable
