# Supplementary material for: Higher plasma high-mobility group box 1 levels are associated with incident cardiovascular disease and all-cause mortality in type 1 diabetes: a 12 year follow-up study
Source: PubMed Central journal article supplement (PMC3411294; doi:10.1007/s00125-012-2622-1), 2012-07-01
Supplement: 125_2012_2622_MOESM5_ESM.pdf [file 125_2012_2622_MOESM5_ESM.pdf]

**ESM Table 4** Associations between plasma  $\log_e$  HMGB1 and markers of low-grade inflammation, endothelial and renal dysfunction, advanced glycation endproducts, and pulse pressure (n=333)

| Dependent variable                          | Model 1 |             |                | Model 2 |             |                |
|---------------------------------------------|---------|-------------|----------------|---------|-------------|----------------|
|                                             | $\beta$ | 95% CI      | <i>p</i> value | $\beta$ | 95% CI      | <i>p</i> value |
| $\log_e$ C-reactive protein                 | 0.05    | -0.06; 0.16 | 0.354          | 0.06    | -0.05; 0.17 | 0.266          |
| $\log_e$ interleukin-6                      | 0.11    | 0.00; 0.21  | 0.049          | 0.08    | -0.03; 0.19 | 0.141          |
| $\log_e$ secreted phospholipase A2          | 0.04    | -0.06; 0.14 | 0.422          | 0.02    | -0.08; 0.13 | 0.668          |
| <i>Low-grade inflammation score</i>         | 0.07    | -0.01; 0.14 | 0.097          | 0.05    | -0.02; 0.13 | 0.173          |
| Soluble vascular cell adhesion molecule-1   | -0.02   | -0.13; 0.08 | 0.677          | -0.02   | -0.12; 0.09 | 0.735          |
| Soluble intercellular adhesion molecule-1   | 0.15    | 0.04; 0.26  | 0.007          | 0.10    | -0.01; 0.20 | 0.071          |
| <i>Endothelial dysfunction score</i>        | 0.06    | -0.02; 0.15 | 0.134          | 0.04    | -0.05; 0.12 | 0.371          |
| Baseline eGFR <sub>MDRD</sub>               | 0.03    | -0.06; 0.12 | 0.487          | 0.00    | -0.08; 0.09 | 0.938          |
| $\log_e$ urinary albumin excretion rate     | 0.01    | -0.03; 0.05 | 0.668          | 0.02    | -0.03; 0.06 | 0.434          |
| Pulse pressure                              | 0.03    | -0.06; 0.13 | 0.485          | 0.03    | -0.05; 0.12 | 0.442          |
| N <sup>ε</sup> -(carboxyethyl)lysine        | 0.08    | -0.03; 0.18 | 0.158          | 0.08    | 0.03; 0.18  | 0.148          |
| N <sup>ε</sup> -(carboxymethyl)lysine       | 0.08    | -0.03; 0.18 | 0.138          | 0.08    | -0.03; 0.18 | 0.135          |
| $\log_e$ pentosidine                        | 0.00    | -0.11; 0.10 | 0.946          | 0.01    | -0.09; 0.11 | 0.878          |
| <i>Advanced glycation endproducts score</i> | 0.05    | -0.05; 0.15 | 0.300          | 0.05    | -0.04; 0.15 | 0.252          |
| $\log_e$ sRAGE                              | -0.05   | -0.16; 0.06 | 0.361          | -0.06   | -0.17; 0.05 | 0.285          |

$\beta$ , standardised regression coefficient: indicates change in dependent variable (in SD) per 1 SD increase in  $\log_e$  HMGB1.

Model 1, adjusted for age, sex, case-control status, duration of diabetes and HbA1c;

Model 2, model 1 + additional adjustments for mean arterial pressure, BMI, smoking status, total cholesterol, use of renin-angiotensin-aldosterone system inhibitors, other antihypertensive treatment, and discontinuation of medication at baseline examination.
